# Supplementary material
Source: PubMed Central journal article supplement (PMC6467069)
Supplement: NIHMS1521161-supplement-1.pdf [file NIHMS1521161-supplement-1.pdf]

## **Supplemental Material**

### **Association of Long-term PM<sub>2.5</sub> Exposure with Traditional and Novel Lipid Measures Related to Cardiovascular Disease Risk**

#### **Table of Contents**

**Supplemental Table 1.** CATHGEN participant characteristics by study inclusion status

**Supplemental Table 2.** Mean LDL levels by participant characteristics.

**Supplemental Table 3.** Pearson correlations for the lipoprotein measures

**Supplemental Table 4.** Adjusted associations between 1- $\mu\text{g}/\text{m}^3$  increases in annual average PM<sub>2.5</sub> and lipoprotein measures

**Supplemental Table 1.** CATHGEN participant characteristics by study inclusion status

| Characteristic                       | Included (N=6,587) | Excluded (N=2,703) |
|--------------------------------------|--------------------|--------------------|
| Age at time of enrollment            | 60.8 ± 12.1        | 60.8 ± 12.1        |
| Body mass index (kg/m <sup>2</sup> ) | 30.1 ± 7.3         | 30.1 ± 6.9         |
| Coronary Artery Disease              |                    |                    |
| Yes                                  | 2950 (50)          | 1255 (49)          |
| No                                   | 2976 (50)          | 1230 (51)          |
| Sex                                  |                    |                    |
| Male                                 | 3,991 (61)         | 1,814 (66)         |
| Female                               | 2,596 (39)         | 933 (34)           |
| Race                                 |                    |                    |
| Non-Hispanic white                   | 4,853 (74)         | 2,128 (77)         |
| African American                     | 1,340 (20)         | 438 (16)           |
| Other                                | 394 (6)            | 181 (7)            |
| History of smoking                   |                    |                    |
| Yes                                  | 3,152 (48)         | 1,287 (47)         |
| No                                   | 3,435 (52)         | 1,460 (53)         |
| History of diabetes                  |                    |                    |
| Yes                                  | 1,886 (29)         | 754 (28)           |
| No                                   | 4,701 (71)         | 1949 (72)          |

**Supplemental Table 2.** Mean LDL levels by participant characteristics

|                                           | Total LDL-P<br>(Mean ± SD) | Small LDL-P<br>(Mean ± SD) | NMR LDL-C<br>(Mean ± SD) |
|-------------------------------------------|----------------------------|----------------------------|--------------------------|
| <b>CAD &gt;23</b>                         |                            |                            |                          |
| Yes                                       | 1462 ± 457                 | 1194 ± 442                 | 98 ± 33                  |
| No                                        | 1460 ± 436                 | 1135 ± 458*                | 99 ± 31                  |
| <b>Age at time of enrollment</b>          |                            |                            |                          |
| <65                                       | 1494 ± 460                 | 1191 ± 475                 | 100 ± 32                 |
| ≥65                                       | 1389 ± 414*                | 1104 ± 403*                | 94 ± 30*                 |
| <b>Sex</b>                                |                            |                            |                          |
| Male                                      | 1409 ± 437                 | 1148 ± 440                 | 94 ± 31                  |
| Female                                    | 1519 ± 450*                | 1171 ± 464*                | 104 ± 32*                |
| <b>Body mass index (kg/m<sup>2</sup>)</b> |                            |                            |                          |
| <18.5 (Underweight)                       | 1377 ± 409                 | 1059 ± 392                 | 94 ± 31                  |
| 18.5-24.9 (Normal weight)                 | 1410 ± 425                 | 1060 ± 427                 | 97 ± 31                  |
| 25.0-29.9 (Overweight)                    | 1431 ± 429                 | 1137 ± 428                 | 96 ± 31                  |
| ≥30.0 (Obese)                             | 1495 ± 466*                | 1224 ± 468*                | 100 ± 32*                |
| <b>Race</b>                               |                            |                            |                          |
| Non-Hispanic white                        | 1440 ± 431                 | 1159 ± 441                 | 96 ± 31                  |
| African American                          | 1504 ± 500                 | 1159 ± 490                 | 103 ± 36                 |
| Other                                     | 1437 ± 404*                | 1127 ± 413                 | 97 ± 29*                 |
| <b>History of smoking</b>                 |                            |                            |                          |
| Yes                                       | 1454 ± 435                 | 1178 ± 444                 | 97 ± 31                  |
| No                                        | 1451 ± 454                 | 1138 ± 455*                | 98 ± 32                  |
| <b>History of diabetes</b>                |                            |                            |                          |
| Yes                                       | 1433 ± 470                 | 1187 ± 471                 | 95 ± 33                  |
| No                                        | 1460 ± 435*                | 1145 ± 440*                | 99 ± 31*                 |
| <b>Area level education</b>               |                            |                            |                          |
| Low                                       | 1476 ± 454                 | 1186 ± 459                 | 99 ± 32                  |
| High                                      | 1437 ± 439*                | 1137 ± 442*                | 97 ± 31*                 |
| <b>Urban/rural status</b>                 |                            |                            |                          |
| Urban                                     | 1431 ± 441                 | 1123 ± 442                 | 97 ± 32                  |
| Rural                                     | 1468 ± 448*                | 1181 ± 454*                | 99 ± 32*                 |

Data are shown as mean ± SD. CAD, coronary artery disease; LDL, low-density lipoprotein; NMR, nuclear magnetic resonance.

\*  $p < 0.05$  using ANOVA

**Supplemental Table 3.** Pearson Correlations for the lipoprotein measures

|              | Total LDL-P and Sizes |             |              |             | Total HDL-P and Sizes |             |              |             | Total TRL-P and Sizes |             |              |             | NMR-derived Lipids |       |        |          |       |
|--------------|-----------------------|-------------|--------------|-------------|-----------------------|-------------|--------------|-------------|-----------------------|-------------|--------------|-------------|--------------------|-------|--------|----------|-------|
|              | Total LDL-P           | Large LDL-P | Medium LDL-P | Small LDL-P | Total HDL-P           | Large HDL-P | Medium HDL-P | Small HDL-P | Total TRL-P           | Large TRL-P | Medium TRL-P | Small TRL-P | LDL-C              | HDL-C | Tot TG | Tot Chol | Apo B |
| Total LDL-P  | 1.00                  |             |              |             |                       |             |              |             |                       |             |              |             |                    |       |        |          |       |
| Large LDL-P  | 0.24                  | 1.00        |              |             |                       |             |              |             |                       |             |              |             |                    |       |        |          |       |
| Medium LDL-P | 0.23                  | 0.18        | 1.00         |             |                       |             |              |             |                       |             |              |             |                    |       |        |          |       |
| Small LDL-P  | 0.80                  | -0.19       | -0.30        | 1.00        |                       |             |              |             |                       |             |              |             |                    |       |        |          |       |
| Total HDL-P  | 0.11                  | 0.05        | 0.15         | 0.03        | 1.00                  |             |              |             |                       |             |              |             |                    |       |        |          |       |
| Large HDL-P  | -0.11                 | 0.24        | 0.11         | -0.25       | 0.26                  | 1.00        |              |             |                       |             |              |             |                    |       |        |          |       |
| Medium HDL-P | 0.09                  | 0.29        | 0.13         | -0.07       | 0.28                  | 0.10        | 1.00         |             |                       |             |              |             |                    |       |        |          |       |
| Small HDL-P  | 0.09                  | -0.22       | 0.03         | 0.15        | 0.71                  | -0.14       | -0.41        | 1.00        |                       |             |              |             |                    |       |        |          |       |
| Total TRL-P  | 0.38                  | -0.09       | -0.03        | 0.43        | 0.17                  | -0.28       | -0.07        | 0.30        | 1.00                  |             |              |             |                    |       |        |          |       |
| Large TRL-P  | 0.13                  | -0.20       | -0.14        | 0.27        | 0.15                  | -0.19       | -0.10        | 0.28        | 0.50                  | 1.00        |              |             |                    |       |        |          |       |
| Medium TRL-P | 0.21                  | -0.21       | -0.19        | 0.37        | 0.10                  | -0.28       | -0.15        | 0.29        | 0.72                  | 0.68        | 1.00         |             |                    |       |        |          |       |
| Small TRL-P  | 0.21                  | 0.08        | 0.09         | 0.14        | 0.10                  | -0.13       | -0.06        | 0.18        | 0.62                  | 0.03        | 0.29         | 1.00        |                    |       |        |          |       |
| LDL-C        | 0.96                  | 0.45        | 0.35         | 0.63        | 0.10                  | -0.04       | 0.18         | -0.01       | 0.27                  | 0.00        | 0.05         | 0.21        | 1.00               |       |        |          |       |
| HDL-C        | 0.01                  | 0.26        | 0.17         | -0.16       | 0.74                  | 0.76        | 0.49         | 0.15        | -0.11                 | -0.06       | -0.16        | -0.06       | 0.08               | 1.00  |        |          |       |
| Total TG     | 0.28                  | -0.18       | -0.12        | 0.40        | 0.17                  | -0.24       | -0.08        | 0.30        | 0.74                  | 0.84        | 0.84         | 0.32        | 0.14               | -0.08 | 1.00   |          |       |
| Total Chol   | 0.89                  | 0.39        | 0.30         | 0.61        | 0.36                  | 0.09        | 0.25         | 0.16        | 0.54                  | 0.23        | 0.31         | 0.37        | 0.90               | 0.31  | 0.42   | 1.00     |       |
| ApoB         | 0.96                  | 0.25        | 0.26         | 0.74        | 0.15                  | -0.16       | 0.08         | 0.15        | 0.60                  | 0.23        | 0.36         | 0.41        | 0.92               | 0.00  | 0.44   | 0.94     | 1.00  |

ApoB, apolipoprotein B; Chol, cholesterol; HDL, high-density lipoprotein; LDL, low-density lipoprotein; NMR, nuclear magnetic resonance; TG, triglyceride; TRL-P, TG-rich Lipoprotein Particle.

**Supplemental Table 4.** Adjusted<sup>a</sup> associations between 1- $\mu\text{g}/\text{m}^3$  increases in annual average  $\text{PM}_{2.5}$  and lipoprotein measures

|                                                                                  | Beta coefficients<br>(95% CI) per 1- $\mu\text{g}/\text{m}^3$ increase | % Change from the<br>mean outcome level<br>(95% CI) per 1- $\mu\text{g}/\text{m}^3$<br>increase |
|----------------------------------------------------------------------------------|------------------------------------------------------------------------|-------------------------------------------------------------------------------------------------|
| <b>LDL Particle (LDL-P) Concentrations (nmol/L)</b>                              |                                                                        |                                                                                                 |
| Total LDL-P                                                                      | 29.0 (20.0, 38.4)                                                      | 2.00 (1.38, 2.64)                                                                               |
| Large LDL-P                                                                      | -1.10 (-4.41, 2.21)                                                    | -0.67 (-2.67, 1.34)                                                                             |
| Medium LDL-P                                                                     | 4.16 (-0.27, 8.58)                                                     | 3.15 (-0.20, 6.50)                                                                              |
| Small LDL-P                                                                      | 26.0 (16.5, 35.4)                                                      | 2.25 (1.43, 3.06)                                                                               |
| <b>HDL Particle (HDL-P) Concentrations (<math>\mu\text{mol}/\text{L}</math>)</b> |                                                                        |                                                                                                 |
| Total HDL-P                                                                      | 0.11 (0.03, 0.19)                                                      | 0.60 (0.16, 1.03)                                                                               |
| Large HDL -P                                                                     | -0.01 (-0.03, 0.02)                                                    | -0.63 (-1.88, 1.25)                                                                             |
| Medium HDL -P                                                                    | 0.12 (0.06, 0.17)                                                      | 2.79 (1.40, 3.95)                                                                               |
| Small HDL-P                                                                      | -0.0002 (-0.08, 0.08)                                                  | -0.002 (-0.65, 0.65)                                                                            |
| <b>TG-rich Lipoprotein Particle (TRLP) Concentrations (nmol/L)</b>               |                                                                        |                                                                                                 |
| Total TRL-P                                                                      | 3.96 (2.42, 5.50)                                                      | 2.98 (1.82, 4.14)                                                                               |
| Large TRL-P                                                                      | 0.11 (0.002, 0.21)                                                     | 4.07 (0.07, 7.78)                                                                               |
| Medium TRL-P                                                                     | 0.88 (0.45, 1.30)                                                      | 4.54 (2.32, 6.70)                                                                               |
| Small TRL-P                                                                      | 0.50 (-0.19, 1.20)                                                     | 1.30 (-0.49, 3.11)                                                                              |
| <b>NMR-derived Lipid and Apolipoprotein Concentrations (mg/dL)</b>               |                                                                        |                                                                                                 |
| LDL-C                                                                            | 1.66 (1.00, 2.32)                                                      | 1.70 (1.02, 2.37)                                                                               |
| HDL-C                                                                            | 0.27 (0.03, 0.50)                                                      | 0.61 (0.07, 1.13)                                                                               |
| Total triglycerides                                                              | 3.49 (1.77, 5.21)                                                      | 3.29 (1.67, 4.92)                                                                               |
| Total cholesterol                                                                | 2.69 (1.87, 3.51)                                                      | 1.62 (1.13, 2.11)                                                                               |
| ApoB                                                                             | 1.67 (1.15, 2.18)                                                      | 2.06 (1.42, 2.69)                                                                               |

ApoB, apolipoprotein B; HDL, high-density lipoprotein; LDL, low-density lipoprotein; NMR, nuclear magnetic resonance; TG, triglyceride; TRL-P, TG-rich Lipoprotein Particle.

<sup>a</sup>Models are adjusted for race, history of smoking, sex, age, area level education, urban/rural status, body mass index, and diabetes.
